# Supplementary material
Source: PubMed Central journal article supplement (PMC4176318)
Supplement: cn500133b_si_001.pdf [file cn500133b_si_001.pdf]

## Supporting Information

### Table S1

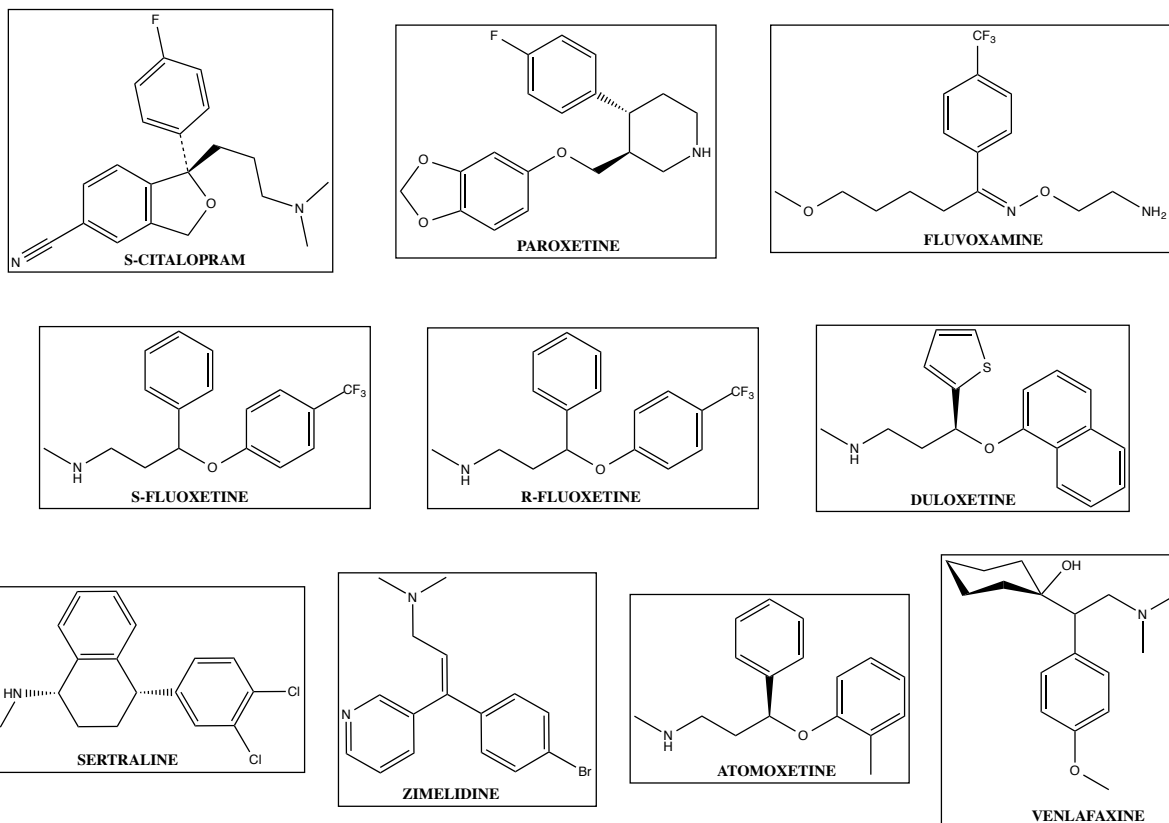

**Table S1:** Structures of the 10 MAT inhibitors used to seed the 1990-compound database in the enrichment docking study.

**Table S2**

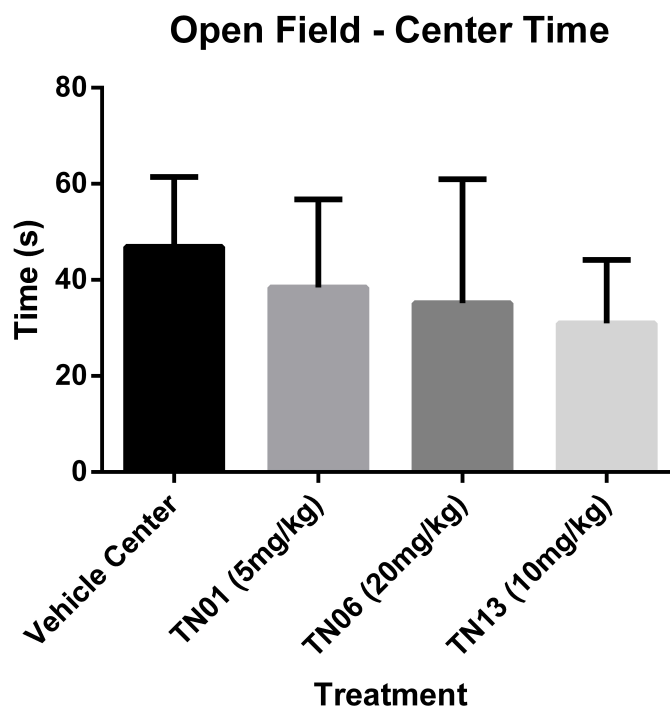

\*p < 0.05

**Figure S1:** “Center time” test for nonspecific motor effects of three VS hit compounds. Naïve C57Bl/6J mice treated with TN-01 (5 mg/kg, n=5), TN-06 (20mg/kg, n=5) or TN-13 (10mg/kg, n=3) showed no significant difference in time in the center compared to saline-treated mice (n=6). P=0.7885; Dunnett’s test compared to saline.
